# Supplementary material for: Genome-Wide Divergence in the West-African Malaria Vector Anopheles melas
Source: PubMed Central journal article supplement (PMC5015944; doi:10.1534/g3.116.031906), 2016-07-27
Supplement: supp_g3.116.031906_TableS1_.pdf [file supp_g3.116.031906_TableS1_.pdf]

**Table S1** Results of sequence read trimming, mapping, and filtering. Raw sequence reads were trimmed using Trimmomatic ver. 0.35. Paired-end reads were trimmed to a minimum Phred quality score of 20, and a minimum length of 50 bp. Only reads with both surviving pairs were retained for mapping. Reads were mapped and filtered to exclude those with mapping quality values (MAPQ) less than 20.

| Population               |                       | <b>West</b>  |            |            |            |            |
|--------------------------|-----------------------|--------------|------------|------------|------------|------------|
| SRA Run Accession        |                       | SRR567657    |            |            |            |            |
| Number Read Pairs        |                       | 78,025,712   |            |            |            |            |
| Read Pairs Post Trimming |                       | 71,441,506   |            |            |            |            |
| Chromosome               |                       | X            | 2R         | 2L         | 3R         | 3L         |
| Reference Size (bp)      |                       | 24,393,108   | 61,545,105 | 49,364,325 | 53,200,684 | 41,963,435 |
| Raw Reads                | Reads Mapped          | 14,738,106   | 25,737,921 | 20,480,713 | 20,907,372 | 16,558,122 |
|                          | Mean Read Length (bp) | 98.79        | 98.88      | 98.94      | 99.00      | 99.04      |
|                          | Read Length SD (bp)   | 7.09         | 6.92       | 6.83       | 6.73       | 6.64       |
|                          | Mean Reads / bp       | 57.69        | 40.54      | 40.17      | 38.09      | 38.17      |
|                          | Reads/bp SD           | 1,600.83     | 250.59     | 102.95     | 60.78      | 573.04     |
| Filtered Reads           | Reads Mapped          | 9,270,784    | 22,656,116 | 17,723,120 | 18,286,869 | 13,696,759 |
|                          | Mean Read Length (bp) | 98.70        | 98.88      | 98.92      | 99.00      | 99.01      |
|                          | Read Length SD (bp)   | 7.17         | 6.90       | 6.83       | 6.70       | 6.67       |
|                          | Mean Reads / bp       | 36.56        | 35.76      | 34.85      | 33.39      | 31.65      |
|                          | Reads/bp SD           | 814.74       | 177.19     | 28.70      | 28.11      | 160.39     |
| Population               |                       | <b>South</b> |            |            |            |            |
| SRA Run Accession        |                       | SRR567658    |            |            |            |            |
| Number Read Pairs        |                       | 52,594,743   |            |            |            |            |
| Read Pairs Post Trimming |                       | 38,797,029   |            |            |            |            |
| Chromosome               |                       | X            | 2R         | 2L         | 3R         | 3L         |
| Reference Size (bp)      |                       | 24,393,108   | 61,545,105 | 49,364,325 | 53,200,684 | 41,963,435 |
| Raw Reads                | Reads Mapped          | 8,063,847    | 12,799,679 | 10,236,490 | 10,365,790 | 8,216,090  |
|                          | Mean Read Length (bp) | 98.89        | 98.96      | 99.03      | 99.08      | 99.11      |
|                          | Read Length SD (bp)   | 6.92         | 6.78       | 6.65       | 6.58       | 6.50       |
|                          | Mean Reads / bp       | 31.38        | 20.04      | 19.94      | 18.77      | 18.84      |

|                |                       |           |            |           |           |           |
|----------------|-----------------------|-----------|------------|-----------|-----------|-----------|
|                | Reads/bp SD           | 977.96    | 178.37     | 156.58    | 32.51     | 319.12    |
| Filtered Reads | Reads Mapped          | 4,995,277 | 11,231,431 | 8,746,514 | 9,039,990 | 6,802,292 |
|                | Mean Read Length (bp) | 98.84     | 98.96      | 99.01     | 99.08     | 99.10     |
|                | Read Length SD (bp)   | 6.91      | 6.74       | 6.66      | 6.55      | 6.50      |
|                | Mean Reads / bp       | 19.58     | 17.62      | 17.10     | 16.41     | 15.63     |
|                | Reads/bp SD           | 593.91    | 133.18     | 16.44     | 15.62     | 123.40    |

|                          |              |
|--------------------------|--------------|
| Population               | <b>Bioko</b> |
| SRA Run Accession        | SRR606147    |
| Number Read Pairs        | 56,776,632   |
| Read Pairs Post Trimming | 50,934,546   |

|                |                       |            |            |            |            |            |
|----------------|-----------------------|------------|------------|------------|------------|------------|
|                | Chromosome            | X          | 2R         | 2L         | 3R         | 3L         |
|                | Reference Size (bp)   | 24,393,108 | 61,545,105 | 49,364,325 | 53,200,684 | 41,963,435 |
| Raw Reads      | Reads Mapped          | 11,841,657 | 18,933,558 | 15,112,849 | 15,353,319 | 12,229,559 |
|                | Mean Read Length (bp) | 98.80      | 98.87      | 98.93      | 98.99      | 99.03      |
|                | Read Length SD (bp)   | 7.05       | 6.92       | 6.83       | 6.73       | 6.64       |
|                | Mean Reads / bp       | 46.32      | 29.88      | 29.69      | 28.03      | 28.25      |
|                | Reads/bp SD           | 1534.00    | 234.71     | 138.21     | 47.87      | 362.08     |
| Filtered Reads | Reads Mapped          | 7,007,348  | 16,527,538 | 12,965,972 | 13,326,759 | 10,065,430 |
|                | Mean Read Length (bp) | 98.71      | 98.86      | 98.90      | 98.98      | 99.00      |
|                | Read Length SD (bp)   | 7.13       | 6.92       | 6.85       | 6.71       | 6.67       |
|                | Mean Reads / bp       | 27.66      | 26.13      | 25.55      | 24.39      | 23.31      |
|                | Reads/bp SD           | 723.69     | 145.95     | 21.54      | 19.60      | 108.90     |
