# Supplementary material for: Genome-Wide Divergence in the West-African Malaria Vector Anopheles melas
Source: PubMed Central journal article supplement (PMC5015944; doi:10.1534/g3.116.031906), 2016-07-27
Supplement: supp_g3.116.031906_TableS2.pdf [file supp_g3.116.031906_TableS2.pdf]

**Table S2** *An. melas* population pair-wise, SNP  $F_{ST}$  values per chromosome arm. Regions of heterochromatin in the *An. gambiae* genome were removed from summary statistics.

|               | X     |        |       |       | 2R    |        |       |       | 2L    |        |       |       |
|---------------|-------|--------|-------|-------|-------|--------|-------|-------|-------|--------|-------|-------|
| Comparison    | Q1    | Median | Mean  | Q3    | Q1    | Median | Mean  | Q3    | Q1    | Median | Mean  | Q3    |
| West - South  | 0.019 | 0.032  | 0.103 | 0.055 | 0.021 | 0.034  | 0.070 | 0.060 | 0.022 | 0.034  | 0.074 | 0.063 |
| West - Bioko  | 0.013 | 0.025  | 0.074 | 0.043 | 0.016 | 0.028  | 0.075 | 0.053 | 0.016 | 0.029  | 0.078 | 0.058 |
| South - Bioko | 0.017 | 0.029  | 0.147 | 0.064 | 0.018 | 0.033  | 0.105 | 0.086 | 0.019 | 0.034  | 0.115 | 0.099 |

  

|               | 3R    |        |       |       | 3L    |        |       |       | Genome-wide |        |       |       |
|---------------|-------|--------|-------|-------|-------|--------|-------|-------|-------------|--------|-------|-------|
| Comparison    | Q1    | Median | Mean  | Q3    | Q1    | Median | Mean  | Q3    | Q1          | Median | Mean  | Q3    |
| West - South  | 0.022 | 0.034  | 0.072 | 0.062 | 0.021 | 0.034  | 0.078 | 0.064 | 0.021       | 0.034  | 0.075 | 0.062 |
| West - Bioko  | 0.016 | 0.029  | 0.076 | 0.059 | 0.016 | 0.029  | 0.076 | 0.057 | 0.016       | 0.028  | 0.076 | 0.055 |
| South - Bioko | 0.018 | 0.034  | 0.111 | 0.092 | 0.018 | 0.034  | 0.116 | 0.094 | 0.018       | 0.033  | 0.114 | 0.091 |
