# Supplementary material for: Genome-Wide Divergence in the West-African Malaria Vector Anopheles melas
Source: PubMed Central journal article supplement (PMC5015944; doi:10.1534/g3.116.031906), 2016-07-27
Supplement: supp_g3.116.031906_TableS3.pdf [file supp_g3.116.031906_TableS3.pdf]

**Table S3** Gene Ontology: Molecular functions for genes harboring significant SNPs found in the bottom 5% Tajima's D regions for the respective populations.

| Molecular Function Category                                     | West - South | West - Bioko | South - Bioko |
|-----------------------------------------------------------------|--------------|--------------|---------------|
| antioxidant activity (GO:0016209)                               | 0            | 1            | 0             |
| binding (GO:0005488)                                            | 13           | 11           | 32            |
| catalytic activity (GO:0003824)                                 | 20           | 21           | 38            |
| enzyme regulator activity (GO:0030234)                          | 3            | 1            | 6             |
| nucleic acid binding transcription factor activity (GO:0001071) | 6            | 4            | 8             |
| protein binding transcription factor activity (GO:0000988)      | 0            | 0            | 1             |
| receptor activity (GO:0004872)                                  | 4            | 5            | 15            |
| structural molecule activity (GO:0005198)                       | 1            | 0            | 9             |
| translation regulator activity (GO:0045182)                     | 0            | 0            | 2             |
| transporter activity (GO:0005215)                               | 3            | 1            | 9             |
| <b>Total Molecular Function Gene Ontology Hits</b>              | <b>50</b>    | <b>44</b>    | <b>120</b>    |
| Genes                                                           | 64           | 62           | 127           |
| SNPs                                                            | 95           | 79           | 188           |
