# Supplementary material for: Genome-Wide Divergence in the West-African Malaria Vector Anopheles melas
Source: PubMed Central journal article supplement (PMC5015944; doi:10.1534/g3.116.031906), 2016-07-27
Supplement: supp_g3.116.031906_TableS4.pdf [file supp_g3.116.031906_TableS4.pdf]

**Table S4** Gene Ontology: Biological processes for genes harboring significant SNPs found in the bottom 5% Tajima's D regions for the respective populations.

| Biological Process Category                                | West - South | West - Bioko | South - Bioko |
|------------------------------------------------------------|--------------|--------------|---------------|
| apoptotic process (GO:0006915)                             | 2            | 2            | 2             |
| biological adhesion (GO:0022610)                           | 1            | 2            | 2             |
| biological regulation (GO:0065007)                         | 8            | 6            | 17            |
| cellular component organization or biogenesis (GO:0071840) | 2            | 1            | 4             |
| cellular process (GO:0009987)                              | 13           | 11           | 29            |
| developmental process (GO:0032502)                         | 5            | 5            | 10            |
| immune system process (GO:0002376)                         | 1            | 2            | 3             |
| localization (GO:0051179)                                  | 8            | 6            | 22            |
| metabolic process (GO:0008152)                             | 30           | 28           | 55            |
| multicellular organismal process (GO:0032501)              | 1            | 2            | 8             |
| reproduction (GO:0000003)                                  | 1            | 1            | 2             |
| response to stimulus (GO:0050896)                          | 2            | 0            | 7             |
| <b>Total Biological Process Gene Ontology Hits</b>         | <b>74</b>    | <b>66</b>    | <b>161</b>    |
| Genes                                                      | 64           | 62           | 127           |
| SNPs                                                       | 95           | 79           | 188           |
