# Supplementary material for: Genome-Wide Divergence in the West-African Malaria Vector Anopheles melas
Source: PubMed Central journal article supplement (PMC5015944; doi:10.1534/g3.116.031906), 2016-07-27
Supplement: supp_g3.116.031906_TableS5.pdf [file supp_g3.116.031906_TableS5.pdf]

**Table S5** Gene Ontology: Protein classes for genes harboring significant SNPs found in the bottom 5% Tajima's D regions for the respective populations.

| Protein Class Category                        | West - South | West - Bioko | South - Bioko |
|-----------------------------------------------|--------------|--------------|---------------|
| calcium-binding protein (PC00060)             | 1            | 0            | 3             |
| cell adhesion molecule (PC00069)              | 1            | 1            | 0             |
| cell junction protein (PC00070)               | 0            | 0            | 1             |
| cytoskeletal protein (PC00085)                | 1            | 0            | 9             |
| defense/immunity protein (PC00090)            | 1            | 2            | 1             |
| enzyme modulator (PC00095)                    | 2            | 2            | 8             |
| extracellular matrix protein (PC00102)        | 3            | 2            | 5             |
| hydrolase (PC00121)                           | 11           | 10           | 20            |
| isomerase (PC00135)                           | 0            | 0            | 2             |
| kinase (PC00137)                              | 0            | 1            | 0             |
| ligase (PC00142)                              | 3            | 2            | 4             |
| lyase (PC00144)                               | 0            | 1            | 0             |
| membrane traffic protein (PC00150)            | 0            | 0            | 1             |
| nucleic acid binding (PC00171)                | 7            | 6            | 13            |
| oxidoreductase (PC00176)                      | 1            | 4            | 4             |
| phosphatase (PC00181)                         | 2            | 2            | 2             |
| protease (PC00190)                            | 7            | 7            | 17            |
| receptor (PC00197)                            | 4            | 5            | 15            |
| signaling molecule (PC00207)                  | 1            | 1            | 6             |
| transcription factor (PC00218)                | 6            | 4            | 9             |
| transfer/carrier protein (PC00219)            | 1            | 0            | 2             |
| transferase (PC00220)                         | 1            | 4            | 5             |
| transporter (PC00227)                         | 2            | 1            | 8             |
| <b>Total Protein Class Gene Ontology Hits</b> | <b>55</b>    | <b>55</b>    | <b>135</b>    |
| Genes                                         | 64           | 62           | 127           |
| SNPs                                          | 95           | 79           | 188           |
