# Supplementary material for: Genome-Wide Divergence in the West-African Malaria Vector Anopheles melas
Source: PubMed Central journal article supplement (PMC5015944; doi:10.1534/g3.116.031906), 2016-07-27
Supplement: supp_g3.116.031906_TableS6.pdf [file supp_g3.116.031906_TableS6.pdf]

**Table S6** Mean Patterson's *D*-statistic values per chromosome arm, resulting from the ABBA-BABA test for introgression using the *An. melas* population tree ((West,Bioko)South)*An. gambiae*).

| Chromosome  | <i>D</i> -Statistic Mean | <i>D</i> -Statistic Std. Error | <i>D</i> -Statistic Jackknife Mean | <i>D</i> -Statistic Jackknife Std. Error | <i>D</i> -Statistic Jackknife Z-Score |
|-------------|--------------------------|--------------------------------|------------------------------------|------------------------------------------|---------------------------------------|
| X           | 0.030                    | 0.0048                         | 0.030                              | 0.0048                                   | 6.15                                  |
| 2R          | 0.049                    | 0.0029                         | 0.049                              | 0.0029                                   | 16.56                                 |
| 2L          | 0.021                    | 0.0058                         | 0.021                              | 0.0058                                   | 3.69                                  |
| 3R          | 0.045                    | 0.0030                         | 0.045                              | 0.0030                                   | 15.10                                 |
| 3L          | 0.048                    | 0.0035                         | 0.048                              | 0.0035                                   | 13.69                                 |
| Genome-wide | 0.040                    | 0.0018                         | 0.040                              | 0.0018                                   | 21.80                                 |
